# Supplementary material
Source: Springer Nature journal article supplement (https://www.springermedizin.de/resource/supplementary/12939_2008_128_MOESM3_ESM.pdf/9551544)

### People living with HIV

- Unknown, 8.4%
- Other, 4.2%
- Mother to child transmission, 0.1%
- Injecting drug user, 0.4%
- Sexual contact between individuals of the same sex, 63.4%
- Sexual contact between individuals of the opposite sex, 23.4%

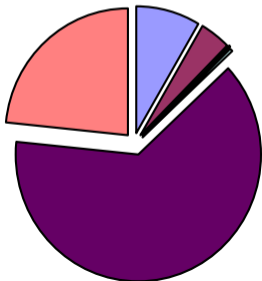

### AIDS patients

- Unknown, 20.7%
- Other, 3.7%
- Mother to child transmission, 0.0%
- Injecting drug user, 0.7%
- Sexual contact between individuals of the same sex, 40.4%
- Sexual contact between individuals of the opposite sex, 34.5%

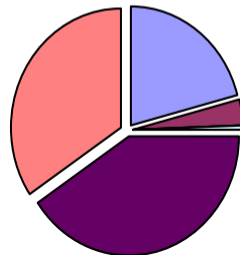

Supplement: MOESM3 [file 9551544]
